# Supplementary material
Source: publisher figshare collection journal article supplement (https://osapublishing.figshare.com/ndownloader/files/17708549)
Supplement: Supplementary file 1 [file 17708549]

#SUBSTANCE=Etna ash
#LOCALISATION= Italy
#Collected by Herbin Herv�  Universit� de Lille
#Originate from the 16th March 2017 eruption.
#Complementary informations: Very coarse. 
Wavenumber,n,k
690,1.796E+00,2.951E-01
695,1.789E+00,2.918E-01
700,1.785E+00,2.821E-01
705,1.787E+00,2.769E-01
710,1.787E+00,2.745E-01
715,1.785E+00,2.713E-01
720,1.785E+00,2.647E-01
725,1.786E+00,2.617E-01
730,1.789E+00,2.556E-01
735,1.790E+00,2.552E-01
740,1.792E+00,2.488E-01
745,1.796E+00,2.460E-01
750,1.800E+00,2.449E-01
755,1.803E+00,2.437E-01
760,1.805E+00,2.438E-01
765,1.806E+00,2.415E-01
770,1.807E+00,2.398E-01
775,1.808E+00,2.359E-01
780,1.810E+00,2.329E-01
785,1.811E+00,2.270E-01
790,1.816E+00,2.182E-01
795,1.822E+00,2.126E-01
800,1.829E+00,2.038E-01
805,1.841E+00,1.961E-01
810,1.855E+00,1.901E-01
815,1.873E+00,1.836E-01
820,1.893E+00,1.831E-01
825,1.914E+00,1.851E-01
830,1.936E+00,1.905E-01
835,1.958E+00,2.020E-01
840,1.979E+00,2.140E-01
845,2.000E+00,2.337E-01
850,2.016E+00,2.539E-01
855,2.030E+00,2.783E-01
860,2.039E+00,3.023E-01
865,2.048E+00,3.253E-01
870,2.054E+00,3.538E-01
875,2.056E+00,3.786E-01
880,2.058E+00,4.041E-01
885,2.057E+00,4.312E-01
890,2.055E+00,4.577E-01
895,2.050E+00,4.876E-01
900,2.040E+00,5.144E-01
905,2.028E+00,5.413E-01
910,2.014E+00,5.662E-01
915,1.997E+00,5.880E-01
920,1.980E+00,6.093E-01
925,1.961E+00,6.274E-01
930,1.943E+00,6.434E-01
935,1.924E+00,6.605E-01
940,1.905E+00,6.725E-01
945,1.887E+00,6.866E-01
950,1.868E+00,7.000E-01
955,1.850E+00,7.121E-01
960,1.831E+00,7.274E-01
965,1.810E+00,7.410E-01
970,1.787E+00,7.556E-01
975,1.761E+00,7.675E-01
980,1.733E+00,7.779E-01
985,1.705E+00,7.856E-01
990,1.676E+00,7.915E-01
995,1.645E+00,7.947E-01
1000,1.616E+00,7.951E-01
1005,1.586E+00,7.948E-01
1010,1.554E+00,7.908E-01
1015,1.525E+00,7.829E-01
1020,1.498E+00,7.745E-01
1025,1.471E+00,7.637E-01
1030,1.446E+00,7.511E-01
1035,1.422E+00,7.374E-01
1040,1.400E+00,7.225E-01
1045,1.381E+00,7.064E-01
1050,1.363E+00,6.903E-01
1055,1.347E+00,6.736E-01
1060,1.333E+00,6.579E-01
1065,1.320E+00,6.426E-01
1070,1.308E+00,6.282E-01
1075,1.297E+00,6.147E-01
1080,1.285E+00,6.022E-01
1085,1.272E+00,5.899E-01
1090,1.260E+00,5.766E-01
1095,1.247E+00,5.628E-01
1100,1.234E+00,5.484E-01
1105,1.222E+00,5.337E-01
1110,1.209E+00,5.170E-01
1115,1.198E+00,4.991E-01
1120,1.188E+00,4.814E-01
1125,1.179E+00,4.631E-01
1130,1.171E+00,4.446E-01
1135,1.164E+00,4.260E-01
1140,1.158E+00,4.074E-01
1145,1.152E+00,3.895E-01
1150,1.147E+00,3.711E-01
1155,1.142E+00,3.522E-01
1160,1.137E+00,3.328E-01
1165,1.133E+00,3.123E-01
1170,1.130E+00,2.908E-01
1175,1.129E+00,2.686E-01
1180,1.130E+00,2.460E-01
1185,1.132E+00,2.238E-01
1190,1.137E+00,2.018E-01
1195,1.143E+00,1.805E-01
1200,1.152E+00,1.603E-01
1205,1.162E+00,1.416E-01
1210,1.172E+00,1.245E-01
1215,1.184E+00,1.092E-01
1220,1.195E+00,9.546E-02
1225,1.207E+00,8.239E-02
1230,1.220E+00,7.055E-02
1235,1.232E+00,6.016E-02
1240,1.245E+00,5.099E-02
1245,1.257E+00,4.269E-02
1250,1.270E+00,3.554E-02
1255,1.282E+00,2.967E-02
1270,1.316E+00,1.736E-02
1285,1.345E+00,1.209E-02
1300,1.369E+00,9.330E-03
1315,1.388E+00,7.710E-03
1330,1.405E+00,6.080E-03
1345,1.420E+00,5.400E-03
1360,1.434E+00,4.850E-03
1375,1.446E+00,4.950E-03
1390,1.458E+00,5.460E-03
1405,1.467E+00,7.370E-03
1420,1.475E+00,8.690E-03
1435,1.482E+00,9.200E-03
1450,1.489E+00,1.004E-02
1465,1.495E+00,1.115E-02
1480,1.500E+00,1.118E-02
1495,1.506E+00,1.164E-02
1510,1.510E+00,1.251E-02
1525,1.514E+00,1.314E-02
1540,1.518E+00,1.347E-02
1555,1.521E+00,1.348E-02
1570,1.525E+00,1.341E-02
1585,1.528E+00,1.324E-02
1600,1.531E+00,1.310E-02
1615,1.534E+00,1.289E-02
1630,1.537E+00,1.286E-02
1645,1.539E+00,1.284E-02
1660,1.542E+00,1.275E-02
1675,1.544E+00,1.264E-02
1690,1.546E+00,1.248E-02
1705,1.549E+00,1.236E-02
1720,1.551E+00,1.221E-02
1735,1.553E+00,1.202E-02
1750,1.554E+00,1.186E-02
1765,1.556E+00,1.167E-02
1780,1.558E+00,1.143E-02
1795,1.560E+00,1.115E-02
1810,1.561E+00,1.088E-02
1825,1.563E+00,1.067E-02
1840,1.564E+00,1.058E-02
1880,1.568E+00,1.000E-02
1920,1.572E+00,9.180E-03
1960,1.575E+00,8.480E-03
2000,1.579E+00,8.000E-03
2040,1.582E+00,7.590E-03
2080,1.585E+00,7.530E-03
2120,1.587E+00,8.290E-03
2160,1.589E+00,8.370E-03
2200,1.591E+00,8.300E-03
2240,1.593E+00,8.210E-03
2280,1.594E+00,8.060E-03
2320,1.595E+00,7.880E-03
2360,1.597E+00,7.670E-03
2400,1.598E+00,7.410E-03
2440,1.599E+00,7.120E-03
2480,1.600E+00,6.820E-03
2520,1.601E+00,6.450E-03
2560,1.601E+00,6.120E-03
2600,1.602E+00,5.350E-03
2640,1.603E+00,4.230E-03
2680,1.604E+00,3.410E-03
2720,1.605E+00,2.560E-03
2760,1.606E+00,1.640E-03
2800,1.607E+00,8.480E-04
2840,1.609E+00,1.661E-06
2880,1.610E+00,0.000E+00
2920,1.612E+00,1.917E-08
2960,1.613E+00,7.655E-08
3000,1.614E+00,1.720E-07
10000,1.639E+00,4.329E-04
10500,1.639E+00,4.818E-04
11000,1.639E+00,5.310E-04
11500,1.639E+00,5.994E-04
12000,1.639E+00,6.538E-04
12500,1.639E+00,6.916E-04
13000,1.639E+00,7.136E-04
13500,1.639E+00,7.218E-04
14000,1.639E+00,7.192E-04
14500,1.639E+00,7.091E-04
15000,1.639E+00,6.928E-04
15500,1.639E+00,6.754E-04
16000,1.639E+00,6.575E-04
16500,1.639E+00,6.400E-04
17000,1.639E+00,6.240E-04
17500,1.639E+00,6.094E-04
18000,1.639E+00,5.964E-04
18500,1.639E+00,5.842E-04
19000,1.639E+00,5.735E-04
19500,1.639E+00,5.637E-04
20000,1.639E+00,5.544E-04
20500,1.640E+00,5.458E-04
21000,1.640E+00,5.377E-04
21500,1.640E+00,5.304E-04
22000,1.640E+00,5.234E-04
22500,1.640E+00,5.155E-04
23000,1.640E+00,5.084E-04
23500,1.640E+00,5.010E-04
24000,1.640E+00,4.934E-04
24500,1.640E+00,4.854E-04
25000,1.640E+00,4.776E-04
25500,1.640E+00,4.700E-04
26000,1.640E+00,4.623E-04
26500,1.640E+00,4.539E-04
27000,1.640E+00,4.458E-04
27500,1.640E+00,4.380E-04
28000,1.640E+00,4.317E-04
28500,1.640E+00,4.271E-04
29000,1.640E+00,4.242E-04
29500,1.640E+00,4.207E-04
30000,1.639E+00,4.176E-04
30500,1.639E+00,4.163E-04
31000,1.639E+00,4.161E-04
31500,1.639E+00,4.155E-04
32000,1.639E+00,4.163E-04
32500,1.638E+00,4.144E-04
